# Supplementary material for: Metal-free tandem carbene N–H insertions and C–C bond cleavages
Source: PubMed Central journal article supplement — Chem Sci. 2020 Nov 10;12(2):803–11. doi: 10.1039/d0sc05763k (PMC8178978; doi:10.1039/d0sc05763k), 2020-11-10
Supplement: SC-012-D0SC05763K-s001.pdf [file SC-012-D0SC05763K-s001.pdf]

# Metal-free tandem carbene N–H insertions and C–C bond cleavages

Pu Chen, Jiang Nan,\* Yan Hu, Yifan Kang, Bo Wang, Yangmin Ma,\* and Michal Szostak\*

Shaanxi Key Laboratory of Chemical Additives for Industry, College of Chemistry and Chemical Engineering, Shaanxi University of Science and Technology, Xi'an 710021, China

Department of Chemistry, Rutgers University, Newark, New Jersey 07102, United States.

Email: nanjiang@sust.edu.cn

## Supporting Information

### Table of Contents:

|                                               |    |
|-----------------------------------------------|----|
| A. General information.....                   | 2  |
| B. Reaction results:.....                     | 2  |
| C. Synthetic transformation of products:..... | 12 |
| D. Mechanistic studies:.....                  | 14 |
| E. References:.....                           | 20 |
| F. NMR spectra and ESI-MS spectrum: .....     | 21 |

## A. General information:

All reagents were used as received unless otherwise noted. DMF, DME and CH<sub>3</sub>CN was dried over CaH<sub>2</sub>. Toluene, 1,4-dioxane and THF were dried over sodium. Analytical thin-layer chromatography was performed with 0.25 mm coated commercial silica gel plates (TLC Silica Gel 60 F<sub>254</sub>); visualization of the developed chromatogram was performed by fluorescence. Flash Chromatography was performed with silica gel (200-300 mesh). Proton-1 nuclear magnetic resonance (<sup>1</sup>H NMR) data were acquired at 400 MHz on a Bruker Ascend 400 (400 MHz) spectrometer, and chemical shifts are reported in delta (δ) units, in parts per million (ppm) downfield from tetramethylsilane. Splitting patterns are designated as s, singlet; d, doublet; t, triplet; q, quartet; m, multiplet, coupling constants *J* are quoted in Hz. Carbon-13 nuclear magnetic resonance (<sup>13</sup>C NMR) data were acquired at 100 MHz on a Bruker Ascend 400 spectrometer, chemical shifts are reported in ppm relative to the center line of a triplet at 77.0 ppm for CDCl<sub>3</sub>. Infrared spectra (IR) data were recorded on a TENSOR 27 FT-IR spectrometer and recorded in wave numbers (cm<sup>-1</sup>). High resolution mass spectra were acquired on a Bruker Daltonics MicroTof-Q II mass spectrometer. (**1a-c**, **i**, **s**, **u**)<sup>1</sup>, (**1d-e**, **t**, **r**)<sup>2</sup>, (**1f**, **k-m**, **p**, **v**)<sup>3</sup>, **1g**<sup>4</sup>, **1h**<sup>5</sup>, **1j**<sup>6</sup>, **1n**<sup>7</sup>, **1o**<sup>8</sup>, **1q**<sup>9</sup>, **1w**<sup>10</sup>, **2a**<sup>11</sup>, **2b**<sup>12</sup>, (**2c-e**)<sup>13</sup>, **2f**<sup>14</sup>, (**3f**)<sup>15</sup> were prepared according to literature methods.

## B. Reaction results:

1)



A pressure tube (capacity: 15.0 mL, outside diameter: 26.0 mm, length: 70.0 mm) was charged with 2-arylaniline **1** (0.2 mmol), diazo compound **2** (0.3 mmol) and TFA (1.2 mL). The reaction mixture was stirred at 100 °C for 15 h under O<sub>2</sub> condition. After cooling to room temperature, a saturated aqueous solution (30 mL) of NaHCO<sub>3</sub> was added, followed by an extraction with EtOAc (3 × 10 mL). The combined organic extracts were dried over anhydrous MgSO<sub>4</sub>, filtered and concentrated under reduced pressure to yield the crude product, which was further purified by silica gel chromatography to afford the desired product **3** or **4**.



### Phenanthridine (**3a**):

White solid (23.3 mg, 65% yield). PE/EA = 10:1, R<sub>f</sub> = 0.25. <sup>1</sup>H NMR (400 MHz, CDCl<sub>3</sub>): δ 9.33 (s, 1H), 8.67-8.57 (m, 2H), 8.25 (d, *J* = 8.1 Hz, 1H), 8.07 (d, *J* = 7.9 Hz, 1H), 7.89 (t, *J* = 7.7 Hz, 1H), 7.79 (t, *J* = 7.5 Hz, 1H), 7.73 (q, *J* = 7.4 Hz, 2H). <sup>13</sup>C NMR (100 MHz, CDCl<sub>3</sub>): δ 153.5, 144.5, 132.6, 131.0, 130.2, 128.7, 128.7, 127.5, 127.1, 126.4, 124.1, 122.2, 121.9. IR (KBr): 3059, 2922, 1630, 1580, 1522, 1449, 1235, 747 cm<sup>-1</sup>. HRMS (ESI) *m/z* calculated for C<sub>13</sub>H<sub>10</sub>N [M+H]<sup>+</sup> 180.0808, found 180.0808.



### 8-Methylphenanthridine (3b):

Pale yellow solid (27.4 mg, 71% yield). PE/EA = 10:1,  $R_f = 0.32$ .  $^1\text{H NMR}$  (400 MHz,  $\text{CDCl}_3$ ):  $\delta$  9.27 (s, 1H), 8.55 (dd,  $J = 19.1, 8.2$  Hz, 2H), 8.22 (d,  $J = 8.1$  Hz, 1H), 7.85 (s, 1H), 7.81-7.66 (m, 3H), 2.64 (s, 3H).  $^{13}\text{C NMR}$  (100 MHz,  $\text{CDCl}_3$ ):  $\delta$  153.4, 144.3, 137.5, 132.8, 130.5, 130.1, 128.2, 128.1, 127.0, 126.6, 124.2, 122.0, 121.8, 21.5. IR (KBr): 3063, 2921, 2854, 1628, 1580, 1454, 1236, 750  $\text{cm}^{-1}$ . HRMS (ESI)  $m/z$  calculated for  $\text{C}_{14}\text{H}_{12}\text{N}$   $[\text{M}+\text{H}]^+$  194.0964, found 194.0958.



### 8-Methoxyphenanthridine (3c):

White solid (27.6 mg, 66% yield). PE/EA = 5:1,  $R_f = 0.30$ .  $^1\text{H NMR}$  (400 MHz,  $\text{CDCl}_3$ ):  $\delta$  9.27 (s, 1H), 8.56 (t,  $J = 8.7$  Hz, 2H), 8.25-8.17 (m, 1H), 7.76-7.65 (m, 2H), 7.54 (dd,  $J = 9.0, 2.6$  Hz, 1H), 7.43 (d,  $J = 2.6$  Hz, 1H), 4.04 (s, 3H).  $^{13}\text{C NMR}$  (100 MHz,  $\text{CDCl}_3$ ):  $\delta$  158.9, 152.8, 143.7, 130.1, 127.8, 127.6, 127.1, 127.0, 124.3, 123.6, 122.0, 121.7, 108.1, 55.6. IR (KBr): 3063, 2933, 2840, 1675, 1619, 1470, 1248, 761  $\text{cm}^{-1}$ . HRMS (ESI)  $m/z$  calculated for  $\text{C}_{14}\text{H}_{12}\text{NO}$   $[\text{M}+\text{H}]^+$  210.0913, found 210.0913.



### 8-Phenylphenanthridine (3d):

Pale yellow solid (26.0 mg, 51% yield). PE/EA = 10:1,  $R_f = 0.35$ .  $^1\text{H NMR}$  (400 MHz,  $\text{CDCl}_3$ ):  $\delta$  9.38 (s, 1H), 8.68 (d,  $J = 8.6$  Hz, 1H), 8.61 (d,  $J = 8.0$  Hz, 1H), 8.30-8.22 (m, 2H), 8.13 (dd,  $J = 8.6, 1.9$  Hz, 1H), 7.89-7.76 (m, 3H), 7.76-7.69 (m, 1H), 7.57 (t,  $J = 7.5$  Hz, 2H), 7.48 (t,  $J = 7.4$  Hz, 1H).  $^{13}\text{C NMR}$  (100 MHz,  $\text{CDCl}_3$ ):  $\delta$  153.7, 144.5, 140.4, 140.0, 131.6, 130.2, 129.1, 128.7, 127.9, 127.3, 127.2, 126.8, 126.6, 124.0, 122.5, 122.3. IR (KBr): 3060, 2926, 1580, 1477, 1233, 760, 686  $\text{cm}^{-1}$ . HRMS (ESI)  $m/z$  calculated for  $\text{C}_{19}\text{H}_{14}\text{N}$   $[\text{M}+\text{H}]^+$  256.1121, found 256.1119.



### 9-Methoxyphenanthridine (3e):

Yellow solid (20.1 mg, 48% yield). PE/EA = 5:1,  $R_f = 0.22$ .  $^1\text{H NMR}$  (400 MHz,  $\text{CDCl}_3$ ):  $\delta$  9.20 (s, 1H), 8.52 (d,  $J = 7.9$  Hz, 1H), 8.21 (d,  $J = 8.2$  Hz, 1H), 7.98 (d,  $J = 8.7$  Hz, 1H), 7.94 (d,  $J = 2.4$  Hz, 1H), 7.77 (t,  $J = 7.6$  Hz, 1H), 7.68 (t,  $J = 7.6$  Hz, 1H), 7.33 (d,  $J = 6.9$  Hz, 1H), 4.07 (s, 3H).  $^{13}\text{C NMR}$  (100 MHz,  $\text{CDCl}_3$ ):  $\delta$  161.8, 152.7, 144.8, 134.6, 130.5, 130.1, 128.7, 126.5, 123.9, 122.2, 121.5, 117.9, 102.6, 55.6. IR (KBr): 3067, 3008, 2943, 1620, 1457, 1231, 761  $\text{cm}^{-1}$ . HRMS (ESI)  $m/z$  calculated for  $\text{C}_{14}\text{H}_{12}\text{NO}$   $[\text{M}+\text{H}]^+$  210.0913, found 210.0913.



#### 7-Methoxyphenanthridine (3e'):

Pale yellow solid (10.0 mg, 24% yield). PE/EA = 5:1,  $R_f = 0.35$ .  $^1\text{H NMR}$  (400 MHz,  $\text{CDCl}_3$ ):  $\delta$  9.79 (s, 1H), 8.59 (d,  $J = 8.2$  Hz, 1H), 8.22 (dd,  $J = 17.3, 8.2$  Hz, 2H), 7.84-7.75 (m, 2H), 7.70 (t,  $J = 7.6$  Hz, 1H), 7.10 (d,  $J = 8.0$  Hz, 1H), 4.11 (s, 3H).  $^{13}\text{C NMR}$  (100 MHz,  $\text{CDCl}_3$ ):  $\delta$  157.5, 148.3, 144.7, 134.0, 131.6, 130.1, 128.7, 126.8, 123.8, 122.7, 117.5, 113.8, 106.7, 55.8. IR (KBr): 3060, 2929, 2840, 1614, 1459, 1257, 1017, 756  $\text{cm}^{-1}$ . HRMS (ESI)  $m/z$  calculated for  $\text{C}_{14}\text{H}_{12}\text{NO}$   $[\text{M}+\text{H}]^+$  210.0913, found 210.0913.



#### [1,3]Dioxolo[4,5-j]phenanthridine (3f):

Yellow solid (37.1 mg, 83% yield). PE/EA = 5:1,  $R_f = 0.20$ .  $^1\text{H NMR}$  (400 MHz,  $\text{CDCl}_3$ ):  $\delta$  9.09 (s, 1H), 8.36 (dd,  $J = 8.2, 1.4$  Hz, 1H), 8.17 (dd,  $J = 8.2, 1.4$  Hz, 1H), 7.87 (s, 1H), 7.78-7.59 (m, 2H), 6.16 (s, 2H).  $^{13}\text{C NMR}$  (100 MHz,  $\text{CDCl}_3$ ):  $\delta$  151.7, 151.4, 148.1, 144.1, 130.2, 130.0, 127.9, 126.6, 124.2, 123.1, 121.9, 105.4, 101.9, 99.8. IR (KBr): 3066, 2914, 1625, 1493, 1467, 1256, 1035, 755  $\text{cm}^{-1}$ . HRMS (ESI)  $m/z$  calculated for  $\text{C}_{14}\text{H}_{10}\text{NO}_2$   $[\text{M}+\text{H}]^+$  224.0706, found 224.0706.



#### 9-Fluorophenanthridine (3g):

Pale yellow solid (24.5 mg, 62% yield). PE/EA = 10:1,  $R_f = 0.23$ .  $^1\text{H NMR}$  (400 MHz,  $\text{CDCl}_3$ ):  $\delta$  9.28 (s, 1H), 8.47 (d,  $J = 8.1$  Hz, 1H), 8.23 (t,  $J = 8.0$  Hz, 2H), 8.09 (dd,  $J = 8.7, 5.7$  Hz, 1H), 7.82 (t,  $J = 7.0$  Hz, 1H), 7.72 (t,  $J = 8.0$  Hz, 1H), 7.47 (td,  $J = 8.5, 2.3$  Hz, 1H).  $^{13}\text{C NMR}$  (100 MHz,  $\text{CDCl}_3$ ):  $\delta$  165.4 (d,  $J = 250.5$  Hz), 152.6, 144.5, 134.8 (d,  $J = 9.6$  Hz), 131.5 (d,  $J = 9.7$  Hz), 130.3, 129.4, 127.1, 123.6 (d,  $J = 4.0$  Hz), 123.4, 122.4, 116.9 (d,  $J = 24.1$  Hz), 107.3 (d,  $J = 22.4$  Hz).  $^{19}\text{F NMR}$  (376 MHz,  $\text{CDCl}_3$ ):  $\delta$  -105.63 to -105.80 (m, 1F). IR (KBr): 3051, 1622, 1493, 1233, 1186, 900, 750  $\text{cm}^{-1}$ . HRMS (ESI)  $m/z$  calculated for  $\text{C}_{13}\text{H}_9\text{FN}$   $[\text{M}+\text{H}]^+$  198.0714,

found 198.0714.



**9-Bromophenanthridine (3h):**

Pale yellow solid (26.3 mg, 51% yield). PE/EA = 10:1,  $R_f$  = 0.22.  $^1\text{H}$  NMR (400 MHz,  $\text{CDCl}_3$ ):  $\delta$  9.28 (s, 1H), 8.79 (s, 1H), 8.58-8.48 (m, 1H), 8.24 (d,  $J$  = 8.2 Hz, 1H), 7.95 (d,  $J$  = 8.4 Hz, 1H), 7.88-7.78 (m, 2H), 7.74 (t,  $J$  = 7.6 Hz, 1H).  $^{13}\text{C}$  NMR (100 MHz,  $\text{CDCl}_3$ ):  $\delta$  152.7, 144.6, 133.9, 130.9, 130.2, 129.4, 127.4, 126.0, 124.9, 124.8, 122.8, 122.2. IR (KBr): 3055, 2921, 1612, 1516, 1451, 1269, 816, 766  $\text{cm}^{-1}$ . HRMS (ESI)  $m/z$  calculated for  $\text{C}_{13}\text{H}_9\text{BrN}$   $[\text{M}+\text{H}]^+$  257.9913, found 257.9912.



**Thieno[2,3-c]quinoline (3i):**

Yellow solid (28.2 mg, 76% yield). PE/EA = 10:1,  $R_f$  = 0.35.  $^1\text{H}$  NMR (400 MHz,  $\text{CDCl}_3$ ):  $\delta$  9.35 (s, 1H), 8.30 (dd,  $J$  = 15.3, 8.2 Hz, 2H), 8.01 (d,  $J$  = 5.3 Hz, 1H), 7.88 (d,  $J$  = 5.3 Hz, 1H), 7.72 (dt,  $J$  = 30.4, 7.6 Hz, 2H).  $^{13}\text{C}$  NMR (100 MHz,  $\text{CDCl}_3$ ):  $\delta$  145.1, 144.4, 141.6, 133.2, 131.6, 129.9, 128.0, 126.9, 124.4, 123.3, 121.5. IR (KBr): 3060, 1726, 1674, 1562, 1457, 954, 761, 731  $\text{cm}^{-1}$ . HRMS (ESI)  $m/z$  calculated for  $\text{C}_{11}\text{H}_8\text{NS}$   $[\text{M}+\text{H}]^+$  186.0372, found 186.0372.



**Furo[3,2-c]quinoline (3j):**

Yellow oil (15.9 mg, 47% yield). PE/EA = 10:1,  $R_f$  = 0.15.  $^1\text{H}$  NMR (400 MHz,  $\text{CDCl}_3$ ):  $\delta$  9.23 (s, 1H), 8.34 (d,  $J$  = 8.1 Hz, 1H), 8.27 (d,  $J$  = 8.4 Hz, 1H), 7.84 (d,  $J$  = 2.0 Hz, 1H), 7.72 (dt,  $J$  = 28.0, 7.1 Hz, 2H), 7.04 (d,  $J$  = 2.0 Hz, 1H).  $^{13}\text{C}$  NMR (100 MHz,  $\text{CDCl}_3$ ):  $\delta$  155.6, 145.8, 145.5, 144.9, 129.7, 128.2, 126.9, 120.1, 120.0, 117.4, 106.1. IR (KBr): 3063, 2925, 1673, 1571, 1504, 1333, 1010, 870, 733  $\text{cm}^{-1}$ . HRMS (ESI)  $m/z$  calculated for  $\text{C}_{11}\text{H}_8\text{NO}$   $[\text{M}+\text{H}]^+$  170.0600, found 170.0600.



**2,7,9-Trimethylphenanthridine (3k):**

Yellow solid (35.9 mg, 81% yield). PE/EA = 10:1,  $R_f$  = 0.26.  $^1\text{H}$  NMR (400 MHz,  $\text{CDCl}_3$ ):  $\delta$  9.45 (s, 1H), 8.35 (s, 1H), 8.24 (s, 1H), 8.10 (d,  $J$  = 8.3 Hz, 1H), 7.57 (d,  $J$  = 8.3 Hz, 1H), 7.31 (s,

1H), 2.83 (s, 3H), 2.66 (s, 3H), 2.61 (s, 3H). <sup>13</sup>C NMR (100 MHz, CDCl<sub>3</sub>): δ 149.1, 142.6, 140.7, 136.5, 136.2, 132.7, 130.4, 130.1, 129.6, 124.0, 123.2, 121.9, 119.5, 22.3, 21.9, 18.7. IR (KBr): 3060, 2920, 2857, 1620, 1508, 1449, 1250, 1032, 824, 748 cm<sup>-1</sup>. HRMS (ESI) m/z calculated for C<sub>16</sub>H<sub>16</sub>N [M+H]<sup>+</sup> 222.1277, found 222.1275.



### 2-Chlorophenanthridine (3l):

Yellow solid (28.2 mg, 66% yield). PE/EA = 10:1, R<sub>f</sub> = 0.30. <sup>1</sup>H NMR (400 MHz, CDCl<sub>3</sub>): δ 9.28 (s, 1H), 8.52 (dd, *J* = 5.4, 3.0 Hz, 2H), 8.14 (d, *J* = 8.8 Hz, 1H), 8.07 (d, *J* = 7.8 Hz, 1H), 7.90 (t, *J* = 7.9 Hz, 1H), 7.77 (t, *J* = 7.5 Hz, 1H), 7.71 (dd, *J* = 8.7, 2.3 Hz, 1H). <sup>13</sup>C NMR (100 MHz, CDCl<sub>3</sub>): δ 153.7, 142.9, 133.0, 131.6, 131.5, 131.3, 129.2, 128.8, 128.2, 126.5, 125.2, 121.9, 121.9. IR (KBr): 3047, 1617, 1484, 1237, 1084, 822, 750 cm<sup>-1</sup>. HRMS (ESI) m/z calculated for C<sub>13</sub>H<sub>9</sub>ClN [M+H]<sup>+</sup> 214.0418, found 214.0417.



### 2-(Trifluoromethyl)phenanthridine (3m):

White solid (24.7 mg, 50% yield). PE/EA = 10:1, R<sub>f</sub> = 0.33. <sup>1</sup>H NMR (400 MHz, CDCl<sub>3</sub>): δ 9.42 (s, 1H), 8.89 (s, 1H), 8.68 (d, *J* = 8.3 Hz, 1H), 8.34 (d, *J* = 8.5 Hz, 1H), 8.15 (d, *J* = 7.9 Hz, 1H), 8.02-7.94 (m, 2H), 7.84 (t, *J* = 7.5 Hz, 1H). <sup>13</sup>C NMR (100 MHz, CDCl<sub>3</sub>): δ 155.7, 146.0, 132.3, 131.8, 131.2, 129.1, 128.8, 128.5, 126.7, 124.7 (q, *J* = 3.1 Hz), 123.9, 123.0 (q, *J* = 270.4 Hz), 122.0, 120.1 (q, *J* = 4.2 Hz). <sup>19</sup>F NMR (376 MHz, CDCl<sub>3</sub>): δ -61.83 (s, 3F). IR (KBr): 3050, 1621, 1431, 1313, 1165, 1110, 749 cm<sup>-1</sup>. HRMS (ESI) m/z calculated for C<sub>14</sub>H<sub>9</sub>F<sub>3</sub>N [M+H]<sup>+</sup> 248.0682, found 248.0681.



### Benzo[a]phenanthridine (3n):

Yellow solid (34.4 mg, 75% yield). PE/EA = 10:1, R<sub>f</sub> = 0.30. <sup>1</sup>H NMR (400 MHz, CDCl<sub>3</sub>): δ 9.42 (s, 1H), 9.14 (dd, *J* = 8.6, 3.8 Hz, 2H), 8.19 (dd, *J* = 8.4, 6.2 Hz, 2H), 8.12-8.05 (m, 2H), 7.93 (t, *J* = 7.8 Hz, 1H), 7.73 (dt, *J* = 23.0, 7.4 Hz, 3H). <sup>13</sup>C NMR (100 MHz, CDCl<sub>3</sub>): δ 152.9, 144.4, 133.3, 132.7, 130.7, 129.8, 129.6, 128.8, 128.7, 128.4, 127.7, 127.5, 126.7, 126.6, 126.5, 126.4, 120.7. IR (KBr): 3053, 1613, 1573, 1507, 1229, 829, 770 cm<sup>-1</sup>. HRMS (ESI) m/z calculated for C<sub>17</sub>H<sub>12</sub>N [M+H]<sup>+</sup> 230.0964, found 230.0963.



**Dibenzo[a,k]phenanthridine (3o):**

Yellow solid (34.5 mg, 62% yield). PE/EA = 10:1,  $R_f = 0.29$ .  $^1\text{H NMR}$  (400 MHz,  $\text{CDCl}_3$ ):  $\delta$  9.37 (s, 1H), 8.69 (d,  $J = 8.5$  Hz, 1H), 8.62 (d,  $J = 8.5$  Hz, 1H), 8.21 (d,  $J = 8.8$  Hz, 1H), 8.13 (d,  $J = 8.8$  Hz, 1H), 8.01 (dd,  $J = 13.9, 7.6$  Hz, 4H), 7.65 (dt,  $J = 24.5, 7.4$  Hz, 2H), 7.44-7.34 (m, 2H).  $^{13}\text{C NMR}$  (100 MHz,  $\text{CDCl}_3$ ):  $\delta$  151.7, 146.2, 134.5, 132.6, 131.2, 130.0, 129.9, 129.1, 129.0, 128.7, 128.7, 128.4, 128.2, 128.0, 127.8, 126.9, 126.4, 125.0, 124.7, 124.4, 121.0. IR (KBr): 3051, 1629, 1569, 1480, 1266, 808, 745  $\text{cm}^{-1}$ . HRMS (ESI)  $m/z$  calculated for  $\text{C}_{21}\text{H}_{14}\text{N}$   $[\text{M}+\text{H}]^+$  280.1121, found 280.1120.



**Benzo[k]phenanthridine (3p):**

Yellow solid (33.5 mg, 73% yield). PE/EA = 10:1,  $R_f = 0.29$ .  $^1\text{H NMR}$  (400 MHz,  $\text{CDCl}_3$ ):  $\delta$  9.37 (s, 1H), 9.20 (d,  $J = 8.7$  Hz, 1H), 9.10 (d,  $J = 8.4$  Hz, 1H), 8.37 (d,  $J = 8.1$  Hz, 1H), 8.07 (dd,  $J = 7.4, 2.0$  Hz, 1H), 8.01 (d,  $J = 8.5$  Hz, 1H), 7.93 (d,  $J = 8.5$  Hz, 1H), 7.86-7.81 (m, 1H), 7.81-7.71 (m, 3H).  $^{13}\text{C NMR}$  (100 MHz,  $\text{CDCl}_3$ ):  $\delta$  152.6, 146.7, 135.2, 131.1, 130.3, 129.0, 128.9, 128.7, 128.2, 128.1, 127.8, 127.0, 126.9, 126.8, 125.2, 125.0, 124.6. IR (KBr): 3053, 1590, 1490, 1384, 1221, 943, 814, 755  $\text{cm}^{-1}$ . HRMS (ESI)  $m/z$  calculated for  $\text{C}_{17}\text{H}_{12}\text{N}$   $[\text{M}+\text{H}]^+$  230.0964, found 230.0963.



**Dibenzo[i,k]phenanthridine (3q):**

Pale yellow solid (44.1 mg, 79% yield). PE/EA = 10:1,  $R_f = 0.29$ .  $^1\text{H NMR}$  (400 MHz,  $\text{CDCl}_3$ ):  $\delta$  10.12 (s, 1H), 8.92 (dd,  $J = 24.5, 8.3$  Hz, 2H), 8.81-8.67 (m, 3H), 8.41-8.28 (m, 1H), 7.91-7.61 (m, 6H).  $^{13}\text{C NMR}$  (100 MHz,  $\text{CDCl}_3$ ):  $\delta$  147.1, 146.9, 132.3, 132.0, 130.0, 129.8, 129.5, 128.5, 128.3, 128.2, 127.9, 127.7, 127.6, 127.4, 126.6, 126.6, 124.0, 123.6, 123.2, 122.8, 121.8. IR (KBr): 3068, 1639, 1575, 1379, 1262, 750, 723  $\text{cm}^{-1}$ . HRMS (ESI)  $m/z$  calculated for  $\text{C}_{21}\text{H}_{14}\text{N}$   $[\text{M}+\text{H}]^+$  280.1121, found 280.1120.



**Ethyl phenanthridine-6-carboxylate (4a):**

Pale yellow oil (38.2 mg, 76% yield). PE/EA = 20:1,  $R_f = 0.21$ .  $^1\text{H NMR}$  (400 MHz,  $\text{CDCl}_3$ ):  $\delta$  8.64 (d,  $J = 8.3$  Hz, 1H), 8.59-8.51 (m, 2H), 8.29 (d,  $J = 7.6$  Hz, 1H), 7.86 (t,  $J = 7.2$  Hz, 1H), 7.80-7.67 (m, 3H), 4.64 (q,  $J = 7.1$  Hz, 2H), 1.53 (t,  $J = 7.1$  Hz, 3H).  $^{13}\text{C NMR}$  (100 MHz,  $\text{CDCl}_3$ ):  $\delta$  166.3, 151.1, 142.6, 133.3, 131.1, 130.8, 128.9, 128.5, 127.8, 127.2, 124.7, 123.3, 122.1, 121.1, 62.3, 14.3. IR (KBr): 3071, 2982, 2850, 1726, 1244, 1192, 1027, 760, 727  $\text{cm}^{-1}$ . HRMS (ESI)  $m/z$  calculated for  $\text{C}_{16}\text{H}_{14}\text{NO}_2$   $[\text{M}+\text{H}]^+$  252.1019, found 252.1019.



**Ethyl 8-methylphenanthridine-6-carboxylate (4b):**

White solid (38.2 mg, 72% yield). PE/EA = 20:1,  $R_f = 0.22$ .  $^1\text{H NMR}$  (400 MHz,  $\text{CDCl}_3$ ):  $\delta$  8.55 (d,  $J = 8.5$  Hz, 2H), 8.30 (s, 1H), 8.29-8.24 (m, 1H), 7.82-7.64 (m, 3H), 4.64 (q,  $J = 7.1$  Hz, 2H), 2.60 (s, 3H), 1.54 (t,  $J = 7.1$  Hz, 3H).  $^{13}\text{C NMR}$  (100 MHz,  $\text{CDCl}_3$ ):  $\delta$  166.4, 150.8, 142.3, 137.9, 132.9, 131.2, 130.7, 128.5, 128.4, 126.4, 124.8, 123.4, 122.0, 121.8, 62.2, 21.8, 14.3. IR (KBr): 3051, 2981, 2851, 1725, 1247, 1171, 1035, 763, 725  $\text{cm}^{-1}$ . HRMS (ESI)  $m/z$  calculated for  $\text{C}_{17}\text{H}_{16}\text{NO}_2$   $[\text{M}+\text{H}]^+$  266.1176, found 266.1174.



**Ethyl 8-methoxyphenanthridine-6-carboxylate (4c):**

White solid (37.7 mg, 67% yield). PE/EA = 20:1,  $R_f = 0.20$ .  $^1\text{H NMR}$  (400 MHz,  $\text{CDCl}_3$ ):  $\delta$  8.56 (d,  $J = 9.1$  Hz, 1H), 8.51-8.47 (m, 1H), 8.29-8.24 (m, 1H), 8.03 (d,  $J = 2.6$  Hz, 1H), 7.73-7.70 (m, 2H), 7.50 (dd,  $J = 9.1, 2.6$  Hz, 1H), 4.64 (q,  $J = 7.1$  Hz, 2H), 3.99 (s, 3H), 1.55 (t,  $J = 7.1$  Hz, 3H).  $^{13}\text{C NMR}$  (100 MHz,  $\text{CDCl}_3$ ):  $\delta$  166.3, 159.0, 149.5, 141.8, 130.9, 128.7, 128.0, 128.0, 125.1, 124.9, 123.7, 122.3, 121.5, 106.7, 62.2, 55.5, 14.3. IR (KBr): 3060, 2980, 2838, 1722, 1617, 1247, 1175, 1105, 763  $\text{cm}^{-1}$ . HRMS (ESI)  $m/z$  calculated for  $\text{C}_{17}\text{H}_{16}\text{NO}_3$   $[\text{M}+\text{H}]^+$  282.1125, found 282.1124.



**Ethyl 8-(methylthio)phenanthridine-6-carboxylate (4d):**

Yellow solid (31.5 mg, 53% yield). PE/EA = 10:1,  $R_f = 0.20$ .  $^1\text{H NMR}$  (400 MHz,  $\text{CDCl}_3$ ):  $\delta$  8.42 (d,  $J = 8.4$  Hz, 2H), 8.34 (s, 1H), 8.25 (d,  $J = 8.0$  Hz, 1H), 7.80-7.58 (m, 3H), 4.65 (q,  $J = 7.1$  Hz, 2H), 2.61 (s, 3H), 1.55 (t,  $J = 7.1$  Hz, 3H).  $^{13}\text{C NMR}$  (100 MHz,  $\text{CDCl}_3$ ):  $\delta$  166.2, 149.5, 142.2, 139.4, 130.9, 130.6, 129.8, 128.8, 128.7, 124.8, 124.0, 122.4, 122.2, 121.7, 62.4, 15.4, 14.4.

IR (KBr): 3068, 2982, 2925, 1723, 1465, 1243, 1180, 1096, 763  $\text{cm}^{-1}$ . HRMS (ESI)  $m/z$  calculated for  $\text{C}_{17}\text{H}_{16}\text{NO}_2\text{S}$   $[\text{M}+\text{H}]^+$  298.0896, found 298.0897.



**Ethyl 8-fluorophenanthridine-6-carboxylate (4e):**

Pale red solid (24.8 mg, 46% yield). PE/EA = 20:1,  $R_f$  = 0.30.  $^1\text{H}$  NMR (400 MHz,  $\text{CDCl}_3$ ):  $\delta$  8.63 (dd,  $J$  = 9.2, 5.3 Hz, 1H), 8.57-8.47 (m, 1H), 8.43-8.24 (m, 2H), 7.79-7.73 (m, 2H), 7.65-7.60 (m, 1H), 4.65 (q,  $J$  = 7.1 Hz, 2H), 1.55 (t,  $J$  = 7.1 Hz, 3H).  $^{13}\text{C}$  NMR (100 MHz,  $\text{CDCl}_3$ ):  $\delta$  165.9, 160.3 (d,  $J$  = 247.4 Hz), 149.5 (d,  $J$  = 4.3 Hz), 142.3, 131.2, 130.2 (d,  $J$  = 1.7 Hz), 129.0 (d,  $J$  = 20.4 Hz), 124.8 (d,  $J$  = 8.9 Hz), 124.7 (d,  $J$  = 8.5 Hz), 124.6, 121.8, 120.4 (d,  $J$  = 20.4 Hz), 112.0 (d,  $J$  = 23.0 Hz), 62.6, 14.4.  $^{19}\text{F}$  NMR (376 MHz,  $\text{CDCl}_3$ ):  $\delta$  -110.58 to -110.84 (m, 1F). IR (KBr): 3068, 2984, 2902, 1723, 1243, 1169, 1032, 764  $\text{cm}^{-1}$ . HRMS (ESI)  $m/z$  calculated for  $\text{C}_{16}\text{H}_{12}\text{FNNO}_2$   $[\text{M}+\text{Na}]^+$  292.0744, found 292.0742.



**Ethyl 8-bromophenanthridine-6-carboxylate (4f):**

White solid (21.8 mg, 33% yield). PE/EA = 20:1,  $R_f$  = 0.31.  $^1\text{H}$  NMR (400 MHz,  $\text{CDCl}_3$ ):  $\delta$  8.75 (d,  $J$  = 2.0 Hz, 1H), 8.51-8.36 (m, 2H), 8.35-8.20 (m, 1H), 7.89 (dd,  $J$  = 8.8, 2.1 Hz, 1H), 7.80-7.69 (m, 2H), 4.65 (q,  $J$  = 7.2 Hz, 2H), 1.55 (t,  $J$  = 7.1 Hz, 3H).  $^{13}\text{C}$  NMR (100 MHz,  $\text{CDCl}_3$ ):  $\delta$  165.7, 149.3, 142.5, 134.3, 132.0, 131.1, 129.8, 129.4, 129.1, 124.6, 124.3, 123.9, 122.1, 121.8, 62.6, 14.4. IR (KBr): 3071, 2982, 1721, 1244, 1179, 1033, 762  $\text{cm}^{-1}$ . HRMS (ESI)  $m/z$  calculated for  $\text{C}_{16}\text{H}_{12}\text{BrNNaO}_2$   $[\text{M}+\text{Na}]^+$  351.9944, found 351.9942.



**Diethyl phenanthridine-6,8-dicarboxylate (4g):**

White solid (26.5 mg, 41% yield). PE/EA = 10:1,  $R_f$  = 0.20.  $^1\text{H}$  NMR (400 MHz,  $\text{CDCl}_3$ ):  $\delta$  9.28 (d,  $J$  = 1.6 Hz, 1H), 8.72 (d,  $J$  = 8.7 Hz, 1H), 8.63 (d,  $J$  = 8.1 Hz, 1H), 8.50 (dd,  $J$  = 8.7, 1.7 Hz, 1H), 8.33 (d,  $J$  = 8.0 Hz, 1H), 7.88-7.76 (m, 2H), 4.70 (q,  $J$  = 7.1 Hz, 2H), 4.51 (q,  $J$  = 7.1 Hz, 2H), 1.59 (t,  $J$  = 7.1 Hz, 3H), 1.49 (t,  $J$  = 7.1 Hz, 3H).  $^{13}\text{C}$  NMR (100 MHz,  $\text{CDCl}_3$ ):  $\delta$  165.9, 165.8, 151.4, 143.5, 136.2, 131.1, 130.9, 130.1, 129.6, 129.0, 124.2, 122.9, 122.6, 122.5, 62.6, 61.6, 14.4, 14.4. IR (KBr): 3061, 2983, 1721, 1262, 1180, 1031, 751  $\text{cm}^{-1}$ . HRMS (ESI)  $m/z$  calculated for  $\text{C}_{19}\text{H}_{17}\text{NNaO}_4$   $[\text{M}+\text{Na}]^+$  346.1050, found 346.1049.



**Ethyl 9-methoxyphenanthridine-6-carboxylate (4h):**

Yellow solid (32.1 mg, 57% yield). PE/EA = 5:1,  $R_f = 0.26$ .  $^1\text{H NMR}$  (400 MHz,  $\text{CDCl}_3$ ):  $\delta$  8.49 (d,  $J = 9.2$  Hz, 2H), 8.27 (d,  $J = 8.1$  Hz, 1H), 7.93 (d,  $J = 2.5$  Hz, 1H), 7.85-7.67 (m, 2H), 7.32 (dd,  $J = 9.2, 2.5$  Hz, 1H), 4.64 (q,  $J = 7.1$  Hz, 2H), 4.05 (s, 3H), 1.54 (t,  $J = 7.1$  Hz, 3H).  $^{13}\text{C NMR}$  (100 MHz,  $\text{CDCl}_3$ ):  $\delta$  166.5, 161.6, 150.5, 143.1, 135.8, 130.9, 129.3, 129.1, 128.0, 124.6, 122.0, 118.5, 118.3, 102.7, 62.3, 55.6, 14.4. IR (KBr): 3069, 2980, 2839, 1726, 1615, 1243, 1192, 1022, 764  $\text{cm}^{-1}$ . HRMS (ESI)  $m/z$  calculated for  $\text{C}_{17}\text{H}_{15}\text{NNaO}_3$   $[\text{M}+\text{Na}]^+$  304.0944, found 304.0943.



**Ethyl [1,3]dioxolo[4,5-j]phenanthridine-6-carboxylate (4i):**

Yellow solid (29.5 mg, 50% yield). PE/EA = 5:1,  $R_f = 0.26$ .  $^1\text{H NMR}$  (400 MHz,  $\text{CDCl}_3$ ):  $\delta$  8.38 (d,  $J = 7.9$  Hz, 1H), 8.25 (d,  $J = 8.4$  Hz, 1H), 7.94 (d,  $J = 9.6$  Hz, 2H), 7.80-7.63 (m, 2H), 6.19 (s, 2H), 4.64 (q,  $J = 7.1$  Hz, 2H), 1.55 (t,  $J = 7.1$  Hz, 3H).  $^{13}\text{C NMR}$  (100 MHz,  $\text{CDCl}_3$ ):  $\delta$  166.5, 151.5, 149.2, 148.6, 142.4, 131.7, 130.8, 128.4, 128.2, 125.0, 121.9, 120.3, 104.4, 102.2, 100.0, 62.4, 14.4. IR (KBr): 3068, 2982, 1721, 1497, 1254, 1033, 764  $\text{cm}^{-1}$ . HRMS (ESI)  $m/z$  calculated for  $\text{C}_{17}\text{H}_{13}\text{NNaO}_4$   $[\text{M}+\text{Na}]^+$  318.0737, found 318.0736.



**Ethyl dibenzo[i,k]phenanthridine-5-carboxylate (4j):**

Yellow solid (51.3 mg, 73% yield). PE/EA = 10:1,  $R_f = 0.19$ .  $^1\text{H NMR}$  (400 MHz,  $\text{CDCl}_3$ ):  $\delta$  8.82-8.57 (m, 4H), 8.34 (d,  $J = 8.3$  Hz, 1H), 8.22 (d,  $J = 8.2$  Hz, 1H), 7.85-7.69 (m, 2H), 7.72-7.55 (m, 4H), 4.55 (q,  $J = 7.2$  Hz, 2H), 1.36 (t,  $J = 7.1$  Hz, 3H).  $^{13}\text{C NMR}$  (100 MHz,  $\text{CDCl}_3$ ):  $\delta$  169.0, 149.6, 145.1, 135.1, 132.5, 130.3, 129.8, 129.7, 129.0, 128.9, 127.7, 127.7, 127.6, 127.6, 127.3, 127.3, 127.0, 126.5, 123.8, 123.4, 120.1, 62.5, 13.9. IR (KBr): 3071, 2981, 1732, 1233, 1190, 1134, 1093, 765, 730  $\text{cm}^{-1}$ . HRMS (ESI)  $m/z$  calculated for  $\text{C}_{24}\text{H}_{17}\text{NNaO}_2$   $[\text{M}+\text{Na}]^+$  374.1151, found 374.1149.



**Ethyl benzo[a]phenanthridine-5-carboxylate (4k):**

Yellow oil (39.8 mg, 66% yield). PE/EA = 20:1,  $R_f = 0.31$ .  $^1\text{H NMR}$  (400 MHz,  $\text{CDCl}_3$ ):  $\delta$  9.04 (d,  $J = 8.8$  Hz, 1H), 8.97 (d,  $J = 7.6$  Hz, 1H), 8.67 (d,  $J = 7.6$  Hz, 1H), 8.17 (d,  $J = 8.8$  Hz, 1H), 8.09-7.96 (m, 2H), 7.86 (t,  $J = 8.5$  Hz, 1H), 7.75-7.70 (m, 1H), 7.70-7.62 (m, 2H), 4.67 (q,  $J = 7.1$  Hz, 2H), 1.55 (t,  $J = 7.1$  Hz, 3H).  $^{13}\text{C NMR}$  (100 MHz,  $\text{CDCl}_3$ ):  $\delta$  166.3, 149.7, 142.4, 133.8, 133.4, 130.6, 129.9, 129.0, 128.7, 128.3, 127.9, 127.2, 127.0, 126.8, 126.8, 126.7, 124.8, 122.1, 62.3, 14.3. IR (KBr): 3071, 2981, 1732, 1233, 1190, 1134, 1093, 765.  $730\text{ cm}^{-1}$ . IR (KBr): 3057, 2983, 2931, 1724, 1265, 1193, 1031, 869, 749  $\text{cm}^{-1}$ . HRMS (ESI)  $m/z$  calculated for  $\text{C}_{20}\text{H}_{15}\text{NNaO}_2$   $[\text{M}+\text{Na}]^+$  324.0995, found 324.0994.

**Ethyl thieno[3,2-c]quinoline-4-carboxylate (4l):**

Yellow solid (21.6 mg, 42% yield). PE/EA = 10:1,  $R_f = 0.20$ .  $^1\text{H NMR}$  (400 MHz,  $\text{CDCl}_3$ ):  $\delta$  8.39 (dd,  $J = 8.4, 1.3$  Hz, 1H), 8.31 (d,  $J = 5.4$  Hz, 1H), 8.13 (dd,  $J = 8.1, 1.5$  Hz, 1H), 7.82-7.58 (m, 3H), 4.64 (q,  $J = 7.2$  Hz, 2H), 1.56 (t,  $J = 7.1$  Hz, 3H).  $^{13}\text{C NMR}$  (100 MHz,  $\text{CDCl}_3$ ):  $\delta$  165.5, 147.5, 143.9, 142.7, 132.1, 131.4, 129.0, 129.0, 126.8, 125.6, 125.3, 123.2, 62.4, 14.4. IR (KBr): 3064, 2987, 2923, 1713, 1301, 1241, 815, 754  $\text{cm}^{-1}$ . HRMS (ESI)  $m/z$  calculated for  $\text{C}_{14}\text{H}_{11}\text{NNaSO}_2$   $[\text{M}+\text{Na}]^+$  280.0403, found 280.0401.

**Ethyl thieno[2,3-c]quinoline-4-carboxylate (4m):**

Yellow solid (30.9 mg, 60% yield). PE/EA = 10:1,  $R_f = 0.22$ .  $^1\text{H NMR}$  (400 MHz,  $\text{CDCl}_3$ ):  $\delta$  8.42 (d,  $J = 7.6$  Hz, 1H), 8.30 (d,  $J = 8.0$  Hz, 1H), 8.02-7.94 (m, 2H), 7.80-7.70 (m, 2H), 4.67 (q,  $J = 8.0$  Hz, 2H), 1.57 (t,  $J = 7.2$  Hz, 3H).  $^{13}\text{C NMR}$  (100 MHz,  $\text{CDCl}_3$ ):  $\delta$  165.3, 143.9, 143.8, 142.2, 134.9, 131.7, 131.1, 128.8, 128.5, 125.2, 123.2, 120.7, 62.8, 14.3. IR (KBr): 3060, 2983, 1708, 1412, 1242, 1139, 770, 732  $\text{cm}^{-1}$ . HRMS (ESI)  $m/z$  calculated for  $\text{C}_{14}\text{H}_{11}\text{NNaSO}_2$   $[\text{M}+\text{Na}]^+$  280.0403, found 280.0402.

**Ethyl 7H-indolo[2,3-c]quinoline-6-carboxylate (4n):**

Yellow solid (31.9 mg, 55% yield). PE/EA = 5:1,  $R_f = 0.23$ .  $^1\text{H NMR}$  (400 MHz,  $\text{CDCl}_3$ ):  $\delta$  10.23 (s, 1H), 8.59 (d,  $J = 8.2$  Hz, 1H), 8.42 (t,  $J = 8.0$  Hz, 2H), 7.78-7.49 (m, 4H), 7.38-7.33 (m, 1H), 4.66 (q,  $J = 7.1$  Hz, 2H), 1.56 (t,  $J = 7.1$  Hz, 3H).  $^{13}\text{C NMR}$  (100 MHz,  $\text{CDCl}_3$ ):  $\delta$  166.6, 141.9, 139.3, 133.3, 132.5, 131.7, 128.9, 127.6, 126.1, 123.7, 123.1, 122.9, 121.5, 120.8, 112.2, 62.4, 14.4. IR (KBr): 3057, 2981, 2931, 1699, 1317, 1192, 1095, 698  $\text{cm}^{-1}$ . HRMS (ESI)  $m/z$  calculated for  $\text{C}_{18}\text{H}_{14}\text{N}_2\text{NaO}_2$   $[\text{M}+\text{Na}]^+$  313.0947, found 313.0947.



**Methyl phenanthridine-6-carboxylate (4o):**

White solid (31.8 mg, 67% yield). PE/EA = 10:1,  $R_f = 0.21$ .  $^1\text{H NMR}$  (400 MHz,  $\text{CDCl}_3$ ):  $\delta$  8.72-8.48 (m, 3H), 8.36-8.19 (m, 1H), 7.88 (t,  $J = 8.3$  Hz, 1H), 7.80-7.70 (m, 3H), 4.15 (s, 3H).  $^{13}\text{C NMR}$  (100 MHz,  $\text{CDCl}_3$ ):  $\delta$  166.5, 150.4, 142.6, 133.5, 131.2, 131.0, 129.1, 128.7, 128.0, 127.4, 125.0, 123.6, 122.2, 122.1, 53.2. IR (KBr): 3063, 3032, 2955, 1715, 1442, 1250, 1200, 741, 715  $\text{cm}^{-1}$ . HRMS (ESI)  $m/z$  calculated for  $\text{C}_{15}\text{H}_{11}\text{NNaO}_2$   $[\text{M}+\text{Na}]^+$  260.0682, found 260.0682.



**6-Methylphenanthridine (5):**

Pale yellow oil (7.2 mg, 18% yield). PE/EA = 10:1,  $R_f = 0.21$ .  $^1\text{H NMR}$  (400 MHz,  $\text{CDCl}_3$ ):  $\delta$  8.67 (d,  $J = 8.3$  Hz, 1H), 8.58 (d,  $J = 8.1$  Hz, 1H), 8.26 (d,  $J = 8.2$  Hz, 1H), 8.16 (d,  $J = 8.1$  Hz, 1H), 7.88 (t,  $J = 7.6$  Hz, 1H), 7.75 (q,  $J = 7.2$  Hz, 2H), 7.66 (t,  $J = 7.6$  Hz, 1H), 3.09 (s, 3H).  $^{13}\text{C NMR}$  (100 MHz,  $\text{CDCl}_3$ ):  $\delta$  158.8, 143.7, 132.6, 130.5, 129.4, 128.6, 127.3, 126.5, 126.3, 125.9, 123.8, 122.3, 121.9, 23.3. IR (KBr): 3067, 2920, 1580, 1484, 1376, 1034, 755, 720  $\text{cm}^{-1}$ . HRMS (ESI)  $m/z$  calculated for  $\text{C}_{14}\text{H}_{12}\text{N}$   $[\text{M}+\text{H}]^+$  194.0964, found 194.0964.



**N-([1,1'-biphenyl]-2-yl)-2-(phenylsulfonyl)propanamide (6):**

Yellow oil. PE/EA = 5:1,  $R_f = 0.32$ .  $^1\text{H NMR}$  (400 MHz,  $\text{CDCl}_3$ ):  $\delta$  8.29 (s, 1H), 8.16 (d,  $J = 8.2$  Hz, 1H), 7.79 (d,  $J = 7.6$  Hz, 2H), 7.71 (t,  $J = 7.4$  Hz, 1H), 7.57 (q,  $J = 7.1$  Hz, 4H), 7.51 (d,  $J = 7.3$  Hz, 1H), 7.49-7.44 (m, 2H), 7.40 (t,  $J = 7.8$  Hz, 1H), 7.35 (d,  $J = 7.5$  Hz, 1H), 7.27 (t,  $J = 7.4$  Hz, 1H), 3.88 (q,  $J = 7.1$  Hz, 1H), 1.52 (d,  $J = 7.1$  Hz, 3H).  $^{13}\text{C NMR}$  (100 MHz,  $\text{CDCl}_3$ ):  $\delta$  162.5, 137.7, 136.2, 134.4, 134.2, 133.4, 130.3, 129.4, 129.2, 129.2, 129.1, 128.4, 128.2, 125.1, 121.6, 66.9, 11.9. IR (KBr): 3059, 1689, 1525, 1445, 1314, 1267, 1144, 741, 725  $\text{cm}^{-1}$ . HRMS (ESI)  $m/z$  calculated for  $\text{C}_{21}\text{H}_{20}\text{NO}_3\text{S}$   $[\text{M}+\text{H}]^+$  366.1158, found 366.1159.

**C. Synthetic transformation of products:**



A pressure tube (capacity: 75.0 mL, outside diameter: 46.0 mm, length: 90.0 mm) was charged with 2-arylaniline **1f** (426.5 mg, 2.0 mmol), diazo compound **2b** (858.9 mg, 3.0 mmol) and TFA (12.0 mL). The reaction mixture was stirred at 100 °C for 15 h under  $\text{O}_2$  condition. After cooling to room temperature, a saturated aqueous solution of  $\text{NaHCO}_3$  was added, followed by an

extraction with EtOAc (3 × 20 mL). The combined organic extracts were dried over anhydrous MgSO<sub>4</sub>, filtered and concentrated under reduced pressure to yield the crude product, which was further purified by silica gel chromatography to afford the desired product **3f** (334.7 mg, 75% yield).



A 50 mL reaction flask was charged with Trisphaeridine **3f** (223.2 mg, 1.0 mmol), MeI (methyl iodide, 2838.8 mg, 20.0 mmol) and toluene (20.0 mL). The reaction mixture was stirred at room temperature for 18 h, then filtered by funnel, and the solid residue was washed by CH<sub>2</sub>Cl<sub>2</sub> to afford **3f<sup>1</sup>** as a yellow solid (193.5 mg, 81% yield). <sup>1</sup>H NMR (400 MHz, DMSO-*d*<sub>6</sub>): δ 9.92 (s, 1H), 9.07 (d, *J* = 8.3 Hz, 1H), 8.66 (s, 1H), 8.48 (d, *J* = 8.6 Hz, 1H), 8.13 (t, *J* = 7.8 Hz, 1H), 8.06 (t, *J* = 7.6 Hz, 1H), 7.92 (s, 1H), 6.52 (s, 2H), 4.62 (s, 3H). <sup>13</sup>C NMR (100 MHz, DMSO-*d*<sub>6</sub>): δ 157.7, 152.3, 150.5, 134.9, 134.1, 132.0, 130.0, 125.4, 125.3, 120.9, 120.1, 107.6, 104.7, 101.8, 45.8. IR (KBr): 3065, 2921, 2851, 1638, 1465, 1267, 1195, 742, 626 cm<sup>-1</sup>. HRMS (ESI) *m/z* calculated for C<sub>15</sub>H<sub>12</sub>NO<sub>2</sub> [M-I]<sup>+</sup> 238.0863, found 238.0862.



A pressure tube (capacity: 15.0 mL, outside diameter: 26.0 mm, length: 70.0 mm) was charged with 5-methyl-[1,3]dioxolo[4,5-j]phenanthridin-5-ium iodide **3f<sup>1</sup>** (73.0 mg, 0.2 mmol) and THF (2.0 mL), LiAlH<sub>4</sub> (30.4 mg, 0.8 mmol) was then slowly added into the solution. The reaction mixture was stirred at room temperature for 1 h, then added ethyl acetate to quench the excess LiAlH<sub>4</sub>, filtered through a thin Celite pad, and concentrated under reduced pressure to yield the crude product, which was further purified by silica gel chromatography to afford the desired product **3f<sup>3</sup>** as a yellow solid (37.3 mg, 78% yield). PE/EA = 50:1, R<sub>f</sub> = 0.35. <sup>1</sup>H NMR (400 MHz, CDCl<sub>3</sub>): δ 7.60 (d, *J* = 8.5 Hz, 1H), 7.30-7.21 (m, 2H), 6.92 (t, *J* = 7.5 Hz, 1H), 6.79 (d, *J* = 8.1 Hz, 1H), 6.68 (s, 1H), 6.01 (s, 2H), 4.14 (s, 2H), 2.96 (s, 3H). <sup>13</sup>C NMR (100 MHz, CDCl<sub>3</sub>): δ 147.6, 146.8, 146.5, 128.4, 127.2, 126.3, 123.7, 123.0, 118.7, 112.2, 106.1, 103.2, 101.0, 55.1, 38.6. IR (KBr): 3060, 2961, 2855, 1635, 1589, 1459, 1394, 1061, 1028, 740 cm<sup>-1</sup>. HRMS (ESI) *m/z* calculated for C<sub>15</sub>H<sub>14</sub>NO<sub>2</sub> [M+H]<sup>+</sup> 240.1019, found 240.1016.



A 10 mL reaction flask was charged with 5-methyl-[1,3]dioxolo[4,5-j]phenanthridin-5-ium iodide **3f<sup>1</sup>** (73.0 mg, 0.2 mmol), *t*-BuOK (44.9 mg, 0.4 mmol) and DMSO (1.0 mL). The reaction mixture was stirred at room temperature for 38 h under air. Then it was diluted with EtOAc (10.0 mL) and water (10.0 mL) and extracted with EtOAc (10 mL × 3). The combined organic extracts

were dried over anhydrous  $\text{MgSO}_4$ , filtered and concentrated under reduced pressure to yield the crude product, which was further purified by silica gel chromatography to afford the desired product **3f** as a white solid (40.5 mg, 80% yield). PE/EA = 10:1,  $R_f = 0.28$ .  $^1\text{H}$  NMR (400 MHz,  $\text{CDCl}_3$ ):  $\delta$  8.11 (d,  $J = 8.0$  Hz, 1H), 7.94 (s, 1H), 7.63 (s, 1H), 7.54 (t,  $J = 7.7$  Hz, 1H), 7.42 (d,  $J = 8.4$  Hz, 1H), 7.37-7.30 (m, 1H), 6.16 (s, 2H), 3.83 (s, 3H).  $^{13}\text{C}$  NMR (100 MHz,  $\text{CDCl}_3$ ):  $\delta$  161.0, 152.2, 148.4, 137.5, 130.4, 128.9, 122.9, 122.3, 121.3, 119.2, 115.0, 107.0, 101.9, 100.4, 30.0. IR (KBr): 3065, 2911, 1640, 1459, 1397, 1250, 1031, 931, 741  $\text{cm}^{-1}$ . HRMS (ESI)  $m/z$  calculated for  $\text{C}_{15}\text{H}_{12}\text{NO}_3$   $[\text{M}+\text{H}]^+$  254.0812, found 254.0810.

#### D. Mechanistic studies:



A pressure tube (capacity: 15.0 mL, outside diameter: 26.0 mm, length: 70.0 mm) was charged with 2-arylaniline **1a** (16.9 mg, 0.1 mmol), **D<sub>5</sub>-1a** (17.4 mg, 0.1 mmol), diazo compound **2b** (85.9 mg, 0.3 mmol) and TFA (1.2 mL). The reaction mixture was stirred at 100 °C for 1 h under  $\text{O}_2$  condition. After cooling to room temperature, a saturated aqueous solution (30 mL) of  $\text{NaHCO}_3$  was added, followed by an extraction with EtOAc ( $3 \times 10$  mL). The combined organic extracts were dried over anhydrous  $\text{MgSO}_4$ , filtered and concentrated under reduced pressure to yield the crude product, which was further purified by silica gel chromatography to afford the desired product **3a** and **d<sub>4</sub>-3a** (15.0 mg, 41% yield).



$$n(\text{H}) = 0.57$$

$$n(\text{D}) = 0.43$$

$$\text{KIE} = k_{\text{H}}/k_{\text{D}} = 1.3$$





A pressure tube (capacity: 15.0 mL, outside diameter: 26.0 mm, length: 70.0 mm) was charged with 2-arylaniline **1a** (33.8 mg, 0.2 mmol), diazo compound **2b** (85.9 mg, 0.3 mmol) and TFA (1.2 mL). The reaction mixture was stirred at 100 °C for 1 h under O<sub>2</sub> condition. After cooling to room temperature, a saturated aqueous solution (30 mL) of NaHCO<sub>3</sub> was added, followed by an extraction with EtOAc (3 × 10 mL). The combined organic extracts were dried over anhydrous MgSO<sub>4</sub>, filtered and concentrated under reduced pressure to yield the crude product, which was further purified by silica gel chromatography to afford the desired product **3a** (15.7 mg, 44% yield).

A pressure tube (capacity: 15.0 mL, outside diameter: 26.0 mm, length: 70.0 mm) was charged with 2-arylaniline **D<sub>5</sub>-1a** (34.9 mg, 0.2 mmol), diazo compound **2b** (85.9 mg, 0.3 mmol) and TFA (1.2 mL). The reaction mixture was stirred at 100 °C for 1 h under O<sub>2</sub> condition. After cooling to room temperature, a saturated aqueous solution (30 mL) of NaHCO<sub>3</sub> was added, followed by an extraction with EtOAc (3 × 10 mL). The combined organic extracts were dried over anhydrous MgSO<sub>4</sub>, filtered and concentrated under reduced pressure to yield the crude product, which was further purified by silica gel chromatography to afford the desired product **d<sub>4</sub>-3a** (14.3 mg, 39% yield).



A pressure tube (capacity: 15.0 mL, outside diameter: 26.0 mm, length: 70.0 mm) was charged with 2-arylaniline **1a** (16.9 mg, 0.1 mmol), **D<sub>5</sub>-1a** (17.4 mg, 0.1 mmol), diazo compound **2d** (65.5 mg, 0.3 mmol) and TFA (1.2 mL). The reaction mixture was stirred at 100 °C for 1 h under O<sub>2</sub> condition. After cooling to room temperature, a saturated aqueous solution (30 mL) of NaHCO<sub>3</sub> was added, followed by an extraction with EtOAc (3 × 10 mL). The combined organic extracts were dried over anhydrous MgSO<sub>4</sub>, filtered and concentrated under reduced pressure to yield the crude product, which was further purified by silica gel chromatography to afford the desired product **4a** and **d<sub>4</sub>-4a** (9.9 mg, 20% yield).



$$n(\text{H}) = 0.53$$

$$n(\text{D}) = 0.47$$

$$\text{KIE} = k_{\text{H}}/k_{\text{D}} = 1.1$$



$$\text{KIE} = k_{\text{H}}/k_{\text{D}} = 0.21/0.19 = 1.1$$

A pressure tube (capacity: 15.0 mL, outside diameter: 26.0 mm, length: 70.0 mm) was charged with 2-arylaniline **1a** (33.8 mg, 0.1 mmol), diazo compound **2d** (65.5 mg, 0.3 mmol) and TFA (1.2 mL). The reaction mixture was stirred at 100 °C for 1 h under O<sub>2</sub> condition. After cooling to room temperature, a saturated aqueous solution (30 mL) of NaHCO<sub>3</sub> was added, followed by an extraction with EtOAc (3 × 10 mL). The combined organic extracts were dried over anhydrous MgSO<sub>4</sub>, filtered and concentrated under reduced pressure to yield the crude product, which was further purified by silica gel chromatography to afford the desired product **4a** (10.5 mg, 21% yield).

A pressure tube (capacity: 15.0 mL, outside diameter: 26.0 mm, length: 70.0 mm) was charged with 2-arylaniline **D<sub>5</sub>-1a** (34.9 mg, 0.1 mmol), diazo compound **2d** (65.5 mg, 0.3 mmol) and TFA (1.2 mL). The reaction mixture was stirred at 100 °C for 1 h under O<sub>2</sub> condition. After cooling to room temperature, a saturated aqueous solution (30 mL) of NaHCO<sub>3</sub> was added,

followed by an extraction with EtOAc (3 × 10 mL). The combined organic extracts were dried over anhydrous MgSO<sub>4</sub>, filtered and concentrated under reduced pressure to yield the crude product, which was further purified by silica gel chromatography to afford the desired product **d**<sub>4</sub>-**4a** (9.7 mg, 19% yield).



A pressure tube (capacity: 15.0 mL, outside diameter: 26.0 mm, length: 70.0 mm) was charged with 2-arylaniline **1a** (33.8 mg, 0.2 mmol), diazo compound **2b** (85.9 mg, 0.3 mmol) and *D*-TFA (1.2 mL). The reaction mixture was stirred at 100 °C for 15 h under O<sub>2</sub> condition. After cooling to room temperature, a saturated aqueous solution (30 mL) of NaHCO<sub>3</sub> was added, followed by an extraction with EtOAc (3 × 10 mL). The combined organic extracts were dried over anhydrous MgSO<sub>4</sub>, filtered and concentrated under reduced pressure to yield the crude product, which was further purified by silica gel chromatography to afford the desired product **3a** and **D-3a** (23.4 mg, 65% yield).



A pressure tube (capacity: 15.0 mL, outside diameter: 26.0 mm, length: 70.0 mm) was charged with Phenanthridine **3a** (17.9 mg, 0.1 mmol) and *D*-TFA (0.6 mL). The reaction mixture

was stirred at 100 °C for 15 h under O<sub>2</sub> condition. After cooling to room temperature, a saturated aqueous solution (30 mL) of NaHCO<sub>3</sub> was added, followed by an extraction with EtOAc (3 × 10 mL). The combined organic extracts were dried over anhydrous MgSO<sub>4</sub>, filtered and concentrated under reduced pressure to yield the crude product, which was further purified by silica gel chromatography to afford the desired product (16.1 mg, 90% yield).



A pressure tube (capacity: 15.0 mL, outside diameter: 26.0 mm, length: 70.0 mm) was charged with N-methyl-[1,1'-biphenyl]-2-amine **7** (36.7 mg, 0.2 mmol) and TFA (1.2 mL). The reaction mixture was stirred at 100 °C for 15 h under O<sub>2</sub> condition. After cooling to room temperature, a saturated aqueous solution (30 mL) of NaHCO<sub>3</sub> was added, followed by an extraction with EtOAc (3 × 10 mL). The combined organic extracts were dried over anhydrous MgSO<sub>4</sub>, filtered and concentrated under reduced pressure to yield the crude product, which was further purified by silica gel chromatography to afford the desired product **3a** (0 mg, 0% yield).



A 10 mL reaction flask was charged with 2-arylaniline **1a** (169.2 mg, 1.0 mmol), 2-bromo-1-phenylethan-1-one (199.0 mg, 1.0 mmol), NaHCO<sub>3</sub> (84.0 mg, 1.0 mmol) and C<sub>2</sub>H<sub>5</sub>OH (2.0 mL). The reaction mixture was stirred at room temperature for 12 h under air, then filtered by funnel,

and the solid residue was washed by C<sub>2</sub>H<sub>5</sub>OH to afford **8** as a white solid (206.7 mg, 72% yield). PE/EA = 20:1, R<sub>f</sub> = 0.33. <sup>1</sup>H NMR (400 MHz, CDCl<sub>3</sub>): δ 8.06-7.99 (m, 2H), 7.65 (d, *J* = 7.5 Hz, 1H), 7.59-7.51 (m, 6H), 7.48-7.42 (m, 1H), 7.34 (dd, *J* = 7.8, 1.6 Hz, 1H), 7.22 (dd, *J* = 7.4, 1.6 Hz, 1H), 6.88 (td, *J* = 7.4, 1.1 Hz, 1H), 6.75 (d, *J* = 8.1 Hz, 1H), 5.31 (s, 1H), 4.66 (d, *J* = 4.5 Hz, 2H). <sup>13</sup>C NMR (100 MHz, CDCl<sub>3</sub>): δ 194.9, 144.1, 139.2, 135.0, 133.8, 130.5, 129.3, 129.0, 128.9, 128.7, 128.2, 127.7, 127.4, 117.5, 110.7, 50.5. IR (KBr): 3057, 1686, 1641, 1508, 1439, 1350, 1211, 990, 743, 696 cm<sup>-1</sup>. HRMS (ESI) *m/z* calculated for C<sub>20</sub>H<sub>18</sub>NO [M+H]<sup>+</sup> 288.1383, found 288.1382.

A pressure tube (capacity: 15.0 mL, outside diameter: 26.0 mm, length: 70.0 mm) was charged with 2-([1,1'-biphenyl]-2-ylamino)-1-phenylethan-1-one **8** (57.5 mg, 0.2 mmol) and TFA (1.2 mL). The reaction mixture was stirred at 100 °C for 15 h under O<sub>2</sub> condition. After cooling to room temperature, a saturated aqueous solution (30 mL) of NaHCO<sub>3</sub> was added, followed by an extraction with EtOAc (3 × 10 mL). The combined organic extracts were dried over anhydrous MgSO<sub>4</sub>, filtered and concentrated under reduced pressure to yield the crude product, which was further purified by silica gel chromatography to afford the desired product **3a** (9.0 mg, 25% yield).



A pressure tube (capacity: 15.0 mL, outside diameter: 26.0 mm, length: 70.0 mm) was charged with 2-arylaniline **1a** (169.2 mg, 1.0 mmol), ethyl 2-bromoacetate (167.0 mg, 1.0 mmol), sodium acetate (98.4 mg, 1.2 mmol) and C<sub>2</sub>H<sub>5</sub>OH (3.0 mL). The reaction mixture was stirred at 78 °C for 12 h under N<sub>2</sub> condition. Ethanol was removed under reduced pressure, Water (10 mL) was added, followed by an extraction with CH<sub>2</sub>Cl<sub>2</sub> (3 × 10 mL). The combined organic layer was washed with aqueous NaHCO<sub>3</sub> and brine, dried over anhydrous MgSO<sub>4</sub>, filtered and concentrated under reduced pressure to yield the crude product, which was further purified by silica gel chromatography to afford the desired product **9** as a Colorless oil (140.5 mg, 55% yield). PE/EA = 20:1, R<sub>f</sub> = 0.35. <sup>1</sup>H NMR (400 MHz, CDCl<sub>3</sub>): δ 7.51 (d, *J* = 4.3 Hz, 4H), 7.41 (q, *J* = 4.3 Hz, 1H), 7.27 (d, *J* = 8.4 Hz, 1H), 7.18 (d, *J* = 8.8 Hz, 1H), 6.87 (t, *J* = 7.4 Hz, 1H), 6.63 (d, *J* = 8.1 Hz, 1H), 4.63 (s, 1H), 4.24 (q, *J* = 7.2 Hz, 2H), 3.94 (d, *J* = 5.7 Hz, 2H), 1.31 (t, *J* = 7.1 Hz, 3H). <sup>13</sup>C NMR (100 MHz, CDCl<sub>3</sub>): δ 171.0, 144.0, 139.2, 130.4, 129.3, 128.9, 128.7, 128.2, 127.3, 117.8, 110.4, 61.2, 45.9, 14.1. IR (KBr): 3063, 2983, 1733, 1641, 1590, 1513, 1442, 1204, 1022, 744, 703 cm<sup>-1</sup>. HRMS (ESI) *m/z* calculated for C<sub>16</sub>H<sub>18</sub>NO<sub>2</sub> [M+H]<sup>+</sup> 256.1332, found 256.1330.

A pressure tube (capacity: 15.0 mL, outside diameter: 26.0 mm, length: 70.0 mm) was charged with ethyl [1,1'-biphenyl]-2-ylglycinate **9** (51.1 mg, 0.2 mmol) and TFA (1.2 mL). The reaction mixture was stirred at 100 °C for 15 h under O<sub>2</sub> condition. After cooling to room temperature, a saturated aqueous solution (30 mL) of NaHCO<sub>3</sub> was added, followed by an extraction with EtOAc (3 × 10 mL). The combined organic extracts were dried over anhydrous MgSO<sub>4</sub>, filtered and concentrated under reduced pressure to yield the crude product, which was further purified by silica gel chromatography to afford the desired product **4a** (11.6 mg, 23% yield).

## E. References:

- (1) P. Bai, X. F. Huang, G. D. Xu and Z. Z. Huang, *Org. Lett.*, 2016, **18**, 3058.
- (2) J. Rong, L. Deng, P. Tan, C. Ni, Y. Gu and J. Hu, *Angew. Chem., Int. Ed.*, 2016, **55**, 2743.
- (3) W. Guo, S. Li, L. Tang, M. Li, L. Wen and C. Chen, *Org. Lett.*, 2015, **17**, 1232.
- (4) B. J. Stokes, B. Jovanovic, H. Dong, K. J. Richert, R. D. Riell and T. G. Driver, *J. Org. Chem.*, 2009, **74**, 3225.
- (5) P. Annamalai, H. Hsiao, S. Raju, Y. Fu, P. Chen, J. Horng, Y. Liu and S. Chuang, *Org. Lett.*, **2019**, **21**, 1182.
- (6) Y. Gao, Z. Cai, S. Li and G. Li, *Org. Lett.*, 2019, **21**, 3663.
- (7) W. Li, W. Chen, B. Zhou, Y. Xu, G. Deng, Y. Liang and Y. Yang, *Org. Lett.*, 2019, **21**, 2718.
- (8) S. Handa and L. M. Slaughter, *Angew. Chem., Int. Ed.*, 2012, **51**, 2912.
- (9) B. Wu and N. Yoshikai, *Angew. Chem., Int. Ed.*, 2015, **54**, 8736.
- (10) Z. Liang, L. Ju, Y. Xie, L. Huang and Y. Zhang, *Chem.-Eur. J.*, 2012, **18**, 15816.
- (11) K. S. Halskov, H. S. Roth and J. A. Ellman, *Angew. Chem., Int. Ed.*, 2017, **56**, 9183.
- (12) C. Chan, H. Wang, R. Hsu and M. Chang, *Synthesis*, 2017, **49**, 2045.
- (13) X. Chen, Y. Xie, X. Xiao, G. Li, Y. Deng, H. Jiang and W. Zeng, *Chem. Commun.*, 2015, **51**, 15328.
- (14) X. Guo, J. Han, Y. Liu, M. Qin, X. Zhang and B. Chen, *J. Org. Chem.*, 2017, **82**, 11505.
- (15) W. L. Chen, C. Y. Chen, Y. F. Chen and J. C. Hsieh, *Org. Lett.*, 2015, **17**, 1613.

### F. NMR spectra and ESI-MS spectrum:



1 #5 RT: 0.03 AV: 1 NL: 7.01E4  
T: FTMS + p ESI Full ms [50.0000-300.0000]



9.27  
8.59  
8.57  
8.54  
8.52  
8.23  
8.21  
7.85  
7.78  
7.76  
7.74  
7.73  
7.72  
7.70  
7.68  
-2.64







3 #9 RT: 0.05 AV: 1 NL: 3.92E4  
T: FTMS + p ESI Full ms [50,0000-300,0000]



9.38  
8.69  
8.67  
8.62  
8.60  
8.27  
8.26  
8.25  
8.15  
8.14  
8.13  
8.12  
7.82  
7.81  
7.81  
7.80  
7.80  
7.78  
7.75  
7.75  
7.73  
7.71  
7.59  
7.57  
7.55  
7.49  
7.48  
7.46





4 #4 RT: 0.02 AV: 1 NL: 6.76E4  
T: FTMS + p ESI Full ms [100.0000-400.0000]





5 #2 RT: 0.01 AV: 1 NL: 5.73E4  
T: FTMS + p ESI Full ms [100.0000-400.0000]







7 #5 RT: 0.03 AV: 1 NL: 3.01E3  
T: FTMS + p ESI Full ms [100.0000-400.0000]



9.28  
8.48  
8.46  
8.25  
8.23  
8.21  
8.10  
8.09  
8.08  
8.07  
7.83  
7.82  
7.80  
7.74  
7.72  
7.70  
7.49  
7.49  
7.47  
7.47  
7.45  
7.45





8 #8 RT: 0.05 AV: 1 NL: 5.39E4  
T: FTMS + p ESI Full ms [100.0000-400.0000]



9.28  
8.79  
8.54  
8.52  
8.25  
8.23  
7.96  
7.94  
7.86  
7.85  
7.84  
7.83  
7.82  
7.80  
7.76  
7.74  
7.72







10 #4 RT: 0.02 AV: 1 NL: 3.09E4  
T: FTMS + p ESI Full ms [100.0000-400.0000]



9.23  
8.35  
8.33  
8.28  
8.26  
7.84  
7.78  
7.76  
7.74  
7.71  
7.69  
7.67  
7.04  
7.04







12#8 RT: 0.05 AV: 1 NL: 9.26E5  
T: FTMS + p ESI Full ms [100.0000-400.0000]







14#1 RT: 0.01 AV: 1 NL: 1.73E4  
T: FTMS + p ESI Full ms [100.0000-400.0000]



-61.83





15#3 RT: 0.02 AV: 1 NL: 3.15E5  
T: FTMS + p ESI Full ms [100.0000-400.0000]







17#3 RT: 0.02 AV: 1 NL: 7.62E4  
T: FTMS + p ESI Full ms [100.0000-400.0000]







19#14 RT: 0.08 AV: 1 NL: 1.59E5  
T: FTMS + p ESI Full ms [100.0000-400.0000]



8.56, 8.55, 8.54, 8.30, 8.28, 8.27, 8.26, 8.25, 7.76, 7.75, 7.74, 7.73, 7.72, 7.70, 4.67, 4.65, 4.64, 4.62, -2.60, 1.56, 1.54, 1.52







21 #11 RT: 0.07 AV: 1 NL: 8.33E4  
 T: FTMS + p ESI Full ms [100.0000-400.0000]



8.44  
 8.41  
 8.35  
 8.26  
 8.23  
 7.74  
 7.73  
 7.72  
 7.72  
 7.72  
 7.70  
 7.70  
 7.70  
 7.69  
 7.69  
 7.68  
 7.68  
 7.68  
 7.67  
 7.67  
 7.66  
 7.66  
 7.65  
 7.65  
 4.67  
 4.66  
 4.64  
 4.62  
 -2.61  
 1.57  
 1.55  
 1.53











24 #2 RT: 0.01 AV: 1 NL: 1.51E5  
T: FTMS + p ESI Full ms [100.0000-400.0000]







26 #4 RT: 0.02 AV: 1 NL: 5.88E4  
T: FTMS + p ESI Full ms [100.0000-400.0000]







28 #7 RT: 0.04 AV: 1 NL: 3.55E6  
T: FTMS + p ESI Full ms [100.0000-500.0000]



9.05  
9.03  
8.98  
8.97  
8.68  
8.66  
8.18  
8.16  
8.03  
8.02  
8.01  
8.00  
7.99  
7.88  
7.88  
7.86  
7.86  
7.84  
7.84  
7.75  
7.75  
7.73  
7.71  
7.71  
7.68  
7.68  
7.67  
7.66  
7.66  
7.65  
7.64  
7.64  
4.69  
4.68  
4.66  
4.64  
1.57  
1.55  
1.53







30 #12 RT: 0.07 AV: 1 NL: 3.73E6  
T: FTMS + p ESI Full ms [100.0000-500.0000]







32 #1 RT: 0.01 AV: 1 NL: 4.55E3  
T: FTMS + p ESI Full ms [100.0000-400.0000]



8.67  
8.65  
8.64  
8.64  
8.64  
8.62  
8.62  
8.60  
8.58  
8.31  
8.30  
8.29  
7.90  
7.89  
7.88  
7.87  
7.86  
7.80  
7.79  
7.78  
7.77  
7.76  
7.75  
7.75  
7.74  
7.73  
7.73  
7.72  
7.71  
-4.15







40 #3 RT: 0.02 AV: 1 NL: 1.78E6  
T: FTMS + p ESI Full ms [100.0000-400.0000]







34 #6 RT: 0.04 AV: 1 NL: 9.60E5  
T: FTMS + p ESI Full ms [100.0000-400.0000]



7.61  
7.59  
7.28  
7.26  
7.24  
6.93  
6.92  
6.90  
6.80  
6.78  
6.68  
6.01  
4.14  
2.96







36 #20 RT: 0.12 AV: 1 NL: 3.57E4  
T: FTMS + p ESI Full ms [100.0000-500.4000]







39#2 RT: 0.01 AV: 1 NL: 5.44E5  
T: FTMS + p ESI Full ms [100.0000-400.0000]
